# Supplementary material for: Process-based microphysical characterization of a strong mid-latitude convective system using aircraft in situ cloud measurements
Source: Copernicus journal article supplement (doi:10.5194/acp-2022-255), 2022-04-22
Supplement: Supplementary file [file acp-2022-255-RC2-supplement.pdf]

## **Overview:**

This paper utilizes in situ aircraft and ground-based remote sensing observations of a midlatitude convective cloud system to describe the microphysical distributions as a function of temperature. The authors employ microphysical insights into characteristic hydrometeor types and growth regimes by combining measurement with state parameters, mainly temperature and RH. While this study provides a thorough evaluation of the case at hand, it has several flaws, some of which appear to originate at a fundamental level.

The Type 1 & 2 classifications seem arbitrary and unimportant, and the phase classifications skeptical. What was the point of using this classification as opposed to just doing a case study of the observed event and describing the thermodynamic and microphysical processes that are potentially active at each flight leg/temperature level? Moreover, the description of glaciation here really just matches the general conceptual model of deep convective mesoscale cloud systems and the dependence of glaciation on temperature. In addition, the authors repeatedly make the statement that tropical convective updrafts are stronger than typical midlatitude continental updrafts, which is untrue, especially when considering organized MCSs or supercells. It is true that in situ observations are rare for continental convection, but retrieval methods (e.g., Dual-Doppler analysis) have been performed.

This manuscript's potential lies in the potential ability to describe rare observations of a single deep convective cloud system. It would make more sense to me to describe the event and the vertical structure of the system generally, including inferences based on microphysical characteristics like the PSD/particle images and the thermodynamics. Moreover, the classification just seems arbitrary. One would expect for "Mostly liquid" clouds to exist near the melting level and transition to fully glaciated at colder temperatures. A classification algorithm is not needed to determine this. The structure of the manuscript also needs some work, as described below.

## **General comments:**

- There is a lot of information and results being presented in the Introduction and it makes things a bit exhausting, especially when you're referencing ahead to figures and sections much later in the paper. I'd recommend merging some of this information with the Results in general and keeping the introduction limited to precursor information and a brief experiment outline.
- You're going to have to convince me that a 50 micron threshold is sufficient for determining that the larger mode is ice. Since we don't have descriptions of the instrumentation yet (in the introduction), we have no idea what's happening at the surface. Rain drops are much larger than 50 microns and can and do exist at subfreezing temperatures in convective systems through lofting. Knowing where that second (ice or liquid) larger mode often exists in size space would be an important description.
- Fig. 1 makes no sense when it is introduced. The figure seems a bit arbitrary, actually.
- Table 1: I think we need some context on why these threshold values are chosen and what they're based on. What are typical concentrations in midlatitude continental

clouds? You cite Costa et al. (2017) a lot, which I'm assuming describes this discrimination algorithm, but details need to be included here as well, even briefly.

- Section 2.2: You are using a lot of space to detail particulars of the algorithm (methods) and haven't really yet presented the algorithm formally, besides in the Introduction where it shouldn't belong. I'd recommend cutting down this Section to give hard specifics on the instrumentation and save the algorithm classification details for the next section
- I appreciate the authors' robust description of instrument uncertainty in Section 2.3. However, I believe this should belong in Section 2.2 when you introduce the instrumentation.
- I'd suggest putting Sections 2.1-2.3 in their own higher-order section, and starting with results (your Section 2.4 onward) in a separate section.
- You didn't say anything about the potential for particles with sizes > 940 microns—your upper instrumentation limit. Is it possible that large aggregates, lofted raindrops, or even graupel were present above this threshold? Radar reflectivity might help to elucidate this. Just a statement on this uncertainty would suffice.
- You clearly show that there are still small spherical particles at colder temperatures for layers designated as "Large Ice". Understanding that these may be liquid droplets or tiny ice fragments from SIP processes, isn't there still a likelihood that these are mixed-phase clouds (i.e., your definition of Coexistence)? This ambiguity makes it difficult to understand the point of your classification scheme.

### **Specific Comments:**

Abstract (Line 32): +/- 4 m/s is not abnormally strong of midlatitude continental deep convective updrafts

Line 54: "mycrophysical" should be "microphysical"

Line 56: Something went wrong here. The citation needs to be in parentheses and the following phrase "in altocumulus clouds" doesn't contextualize with the beginning of the sentence.

Line 69: should be "understanding of stratiform MPCs"

Line 83: See comment about abstract. These are not unusually strong at all

Line 91: We need some context of what these instruments measure. If you describe it later, just a short phrase will do.

Line 95: I think I see why you've labeled this "Large Ice", but it is going to be a bit confusing for the reader because 50 microns is rather small ice, especially in convective systems where graupel and snow are prevalent

Lines 151-152: need to break sentences before "second" and again before "finally"—this is a run-on sentence

Lines 153-157: What is the point in numbering arbitrary flight levels? I would remove these and just state the altitudes or give an altitude range

Line 157: Remove comma after “both”

Lines 174-175: Any evidence that most particles with  $D_p < 50$  microns in “Large Ice” clouds are frozen? This seems fundamentally flawed because you’re using a 50-micron threshold to distinguish between this class and the other 3.

Line 176: the description here of “Secondary Ice” is very confusing, because you haven’t yet introduced how this distinction is made.

Line 186: What did you do to detect and negate out-of-focus images?

Lines 281-283: Several grammatical errors in this sentence owing to the separation of flight level descriptions. Recommend breaking this up into more sentences and/or fix the comma separation mistakes.

Line 296: Except they are *\*not\** showing the total number concentrations, they are showing the number concentrations per size bin

Lines 301-302: I don’t understand this statement. What do you mean by “large particles” if  $D_p < 50$  microns?

Lines 309-310: this is a bit confusing without reference to expected concentrations for liquid and ice. You say ice is at a high concentration of  $0.1 \text{ g/m}^3$  but then state the liquid concentrations are low at an upper bound of  $3 \text{ g/m}^3$ . Be sure to contextualize these values with what is considered high or low for each phase in this cloud regime

Lines 310-311: Aren’t all of these clouds part of the same convective cloud system? I would clarify this and refer to parts of the cloud system that exist within the same cloud microphysical regime.

Lines 315-316: Again, context is needed, at least in the initial discussion, on what baseline values are for “high” and “low” in regard to phase.

Line 321: I think it is important to mention how prevalent large spherical drops are present. This system looks like it’s raining. Perhaps give a frequency of how often spherical drops  $> 50$  microns are present? Isn’t that information available through the previously mentioned processing algorithms?

Line 325: Why is this unexpected? Because of what was shown in Fig. 7?

Line 333: You need to give some description, preferably in the instrumentation section, on how vertical velocities are measured.

Lines 345-349: Again, these are not considered high for midlatitude continental convection. See, for example, Wang et al. (2020):  
<https://agupubs.onlinelibrary.wiley.com/doi/epdf/10.1029/2019JD031774>.

Line 355: Earlier you mentioned that mass modes were used for discrimination. Mass size distributions (MSDs) do not peak at the same sizes as number size distributions (PSDs). Please clarify.

Line 356: Here again you say mass mode but you refer to a PSD. A mass mode would require some type of a mass-size relationship (used to integrate and derive LWC/IWC), unless independent bulk condensate measurements were provided.

Line 357: But did Costa et al. (2017) analyze a midlatitude convective system? These threshold values would likely be cloud-regime-dependent.

~Line 455: It is not clear to me how you make a distinction of “secondary ice”, and you should mention other potential SIP mechanisms (e.g., drop freezing).

Line 457: This “typical PSD” is for Secondary Ice clouds? Fig. 13 sure looks like a small mode exists for  $D_p < 50$  microns, in which case your argument is supported, but you state differently here.

Fig. 14: It’s confusing to switch to Kelvin units here when you’ve been using Celsius for the rest of the manuscript. Recommend changing.
